# Supplementary material for: Disease‐associated tau impairs mitophagy by inhibiting Parkin translocation to mitochondria
Source: PubMed Central journal article supplement — EMBO J. 2018 Dec 11;38(3):e99360. doi: 10.15252/embj.201899360 (PMC6356067; doi:10.15252/embj.201899360), 2018-12-11
Supplement: EMBJ-38-e99360-s001.pdf [file EMBJ-38-e99360-s001.pdf]

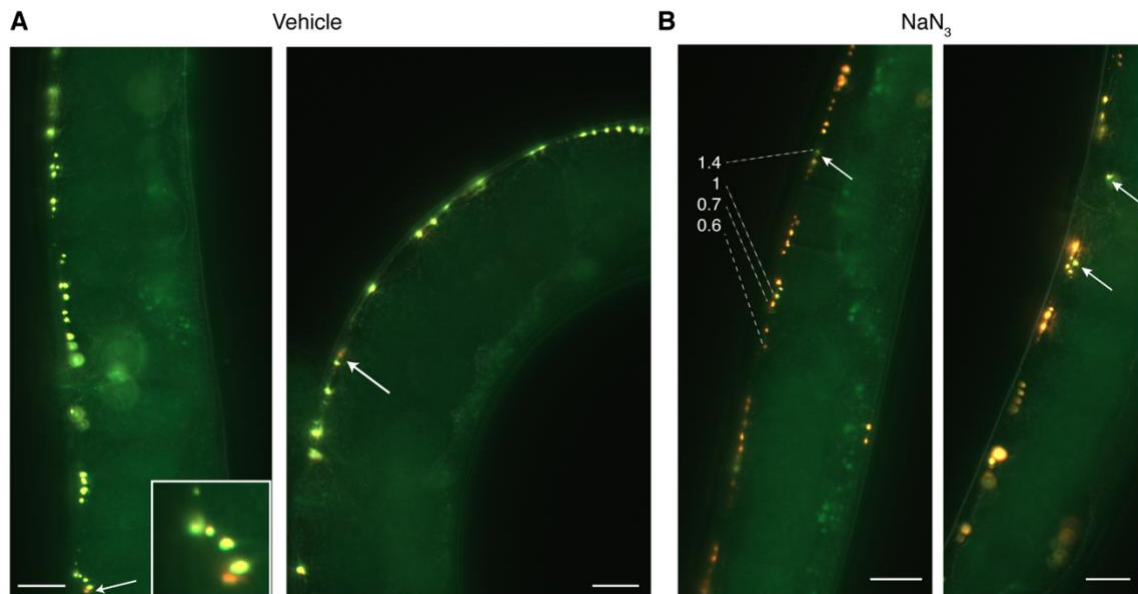

**Figure S1. Mitochondria in the ventral cord of *C. elegans*.**

A Mito-Rosella in the ventral cord of vehicle treated worms. Arrows point to mitochondria undergoing basal mitophagy (inset), as illustrated by the decreased GFP fluorescence.

B Mitophagy in response to sodium azide treatment, as illustrated by the decreased GFP fluorescence. Some mitochondria (arrows) did not undergo mitophagy and the GFP fluorescence remained. Example GFP/dsRed ratios are given for corresponding mitochondria.

Scale bar = 20  $\mu$ m.
