# Supplementary material for: Disease‐associated tau impairs mitophagy by inhibiting Parkin translocation to mitochondria
Source: PubMed Central journal article supplement — EMBO J. 2018 Dec 11;38(3):e99360. doi: 10.15252/embj.201899360 (PMC6356067; doi:10.15252/embj.201899360), 2018-12-11
Supplement: EMBJ-38-e99360-s002.pdf [file EMBJ-38-e99360-s002.pdf]

## Expanded View Figures

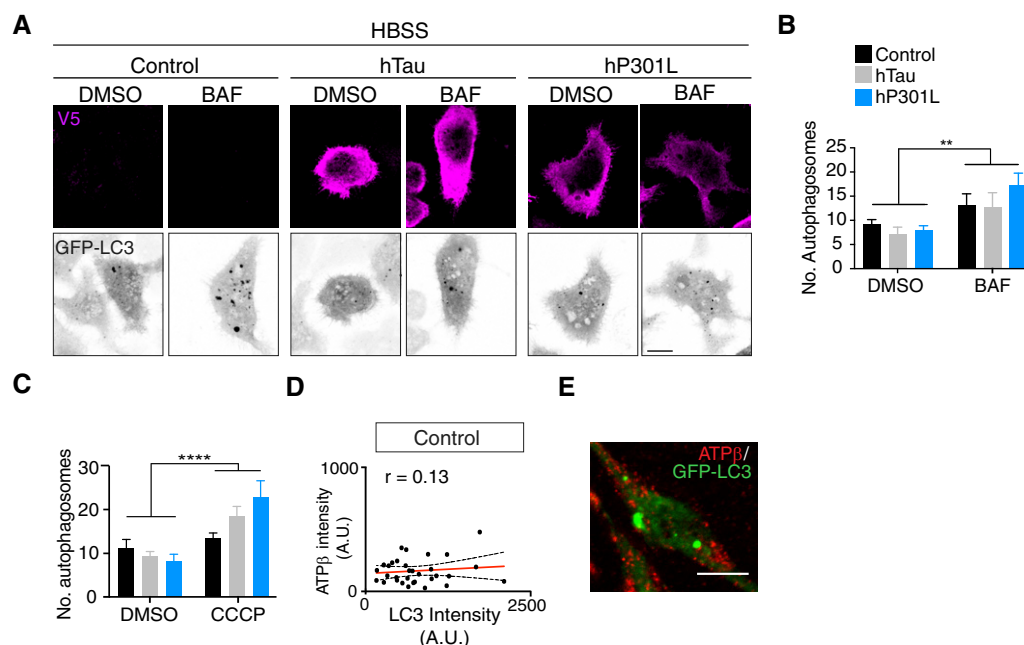

**Figure EV1. Transient transfection of Tau does not impair autophagic flux.**

- A** Representative images of N2a cells expressing GFP-LC3 and hTau, hP301L or control vector, that were starved in HBSS and treated with bafilomycin A (BAF), illustrating an increase in LC3-positive autophagosomes with BAF treatment.
- B** Quantification of LC3-positive autophagosomes after 24 h of tau expression in starved cells that were treated with DMSO or BAF. Data were analysed by two-way ANOVA, illustrating a main effect of BAF treatment,  $F(1, 135) = 10.3$ ,  $P = 0.0017$ , but no main effect of tau expression,  $F(2, 135) = 0.5425$ ,  $P = 0.5826$  and no significant interaction effect  $F(2, 135) = 0.6667$ ,  $P = 0.5151$ ,  $n = 19$ –35 cells/group.
- C** Quantification of LC3-positive autophagosomes after 24 h of tau expression and 4 h of CCCP treatment, revealing no inhibition of autophagosome formation by tau. Data were analysed by two-way ANOVA, illustrating a main effect of CCCP treatment,  $F(1, 158) = 17.81$ ,  $P < 0.0001$ , but no main effect of tau expression,  $F(2, 158) = 0.7444$ ,  $P = 0.4767$  and no significant interaction effect  $F(2, 158) = 2.939$ ,  $P = 0.0558$ ,  $n = 19$ –34 cells/group.
- D, E** LC3 fluorescence intensity does not correlate with the mitochondrial signal, indicating a lack of colocalisation ( $r = 0.125$ ,  $P = 0.4867$ ),  $n = 33$  cells.

Data information: Data are given as mean and SEM,  $**P < 0.01$ ,  $****P < 0.0001$ . Scale bar = 10  $\mu$ m.

Source data are available online for this figure.

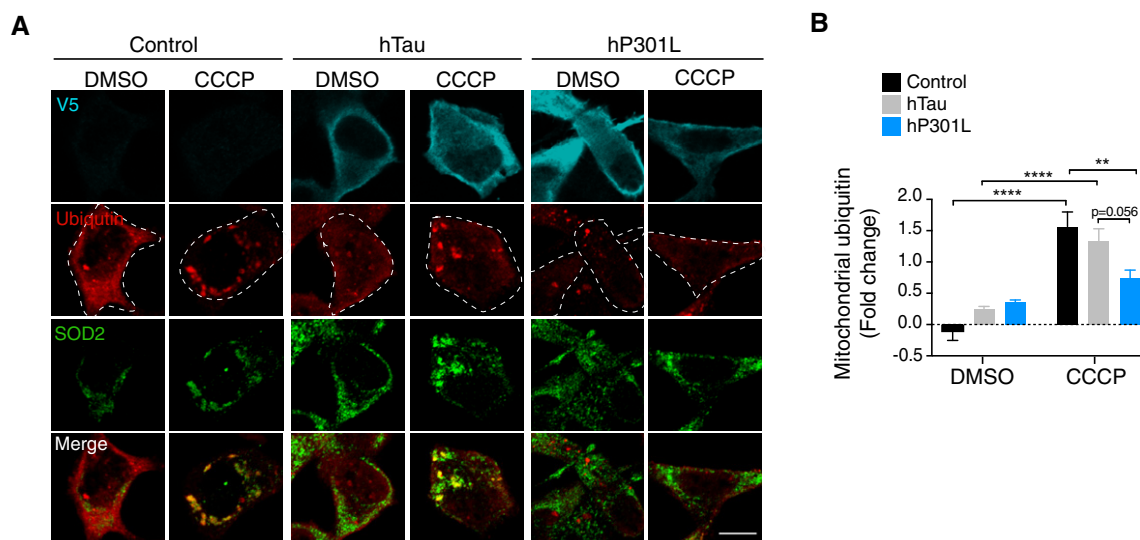

**Figure EV2. Ubiquitination of mitochondrial targets is reduced by hP301L.**

- A Representative images of N2a cells transfected with hTau, hP301L, or empty vector control and myc-Parkin for 24 h and treated with CCCP for 4 h. Immunostaining was performed for mitochondria (SOD2) and ubiquitin. Scale bar = 10  $\mu$ m.
- B Mitochondrial ubiquitin was quantified by assessing its fluorescence intensity in mitochondrial ROIs and calculating the fold change over whole-cell ubiquitin intensity. Data were analysed by two-way ANOVA, revealing a main effect of CCCP treatment  $F(1, 124) = 58.7$ ,  $P < 0.0001$ , no main effect of tau species  $F(2, 124) = 1.21$ ,  $P = 0.3004$ , and a significant interaction effect  $F(2, 124) = 7.16$ ,  $P = 0.0011$ . Data are given as mean and SEM,  $**P < 0.01$ ,  $****P < 0.0001$  for simple effects,  $n = 15$ –29 cells/group.

Source data are available online for this figure.

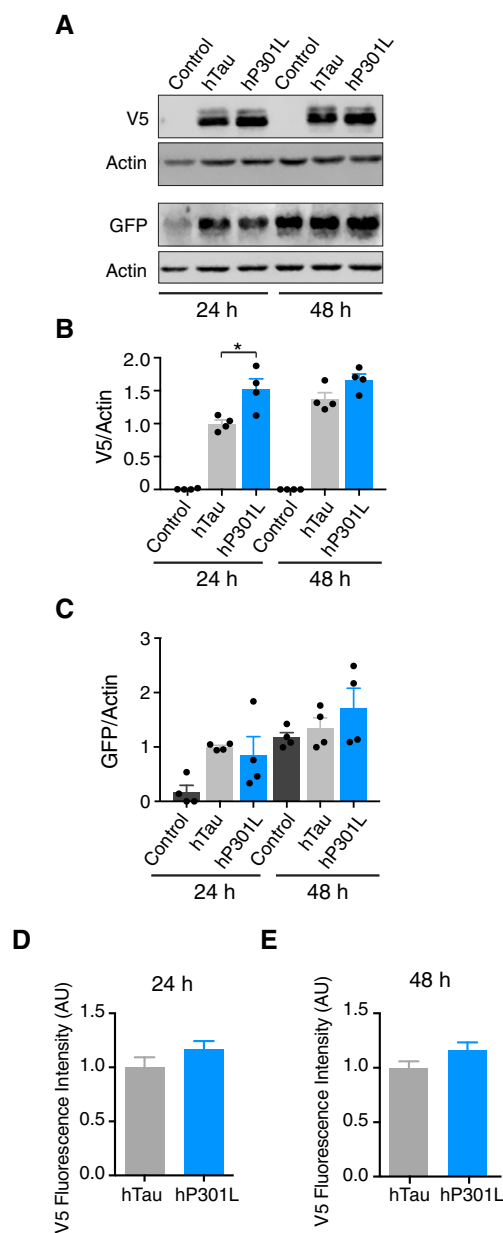**Figure EV3. Tau and Parkin expression levels.**

- A** Immunoblots illustrating population expression level of Tau-V5 and GFP-Parkin at 24 and 48 h post-transfection.
- B** Quantification of human tau levels from immunoblots. Tau levels were compared using two-way ANOVA, with the control group excluded from the statistical analysis, revealing a main effect of expression time,  $F(1, 12) = 5.865$ ,  $P = 0.0322$ , a main effect of tau species,  $F(1, 12) = 14.66$ ,  $P = 0.0024$  and no interaction effect  $F(1, 12) = 1.187$ ,  $P = 0.2972$ .
- C** Quantification of GFP-Parkin levels from immunoblots. Parkin levels were compared using two-way ANOVA, revealing a main effect of expression time,  $F(1, 18) = 16.29$ ,  $P = 0.0008$ , a main effect of tau species,  $F(2, 18) = 4.249$ ,  $P = 0.0308$  and no interaction effect  $F(2, 18) = 1.176$ ,  $P = 0.3313$ .
- D, E** Tau expression level in cells analysed for Parkin translocation, as represented by V5 fluorescence intensity following immunostaining, at 24 h (unpaired  $t$ -test  $t = 1.412$ ,  $P = 0.1692$ ) and at 48 h ( $t = 1.673$ ,  $P = 0.0979$ ).

Data information: Data are given as mean and SEM, with  $*P < 0.05$  for simple effects.

Source data are available online for this figure.

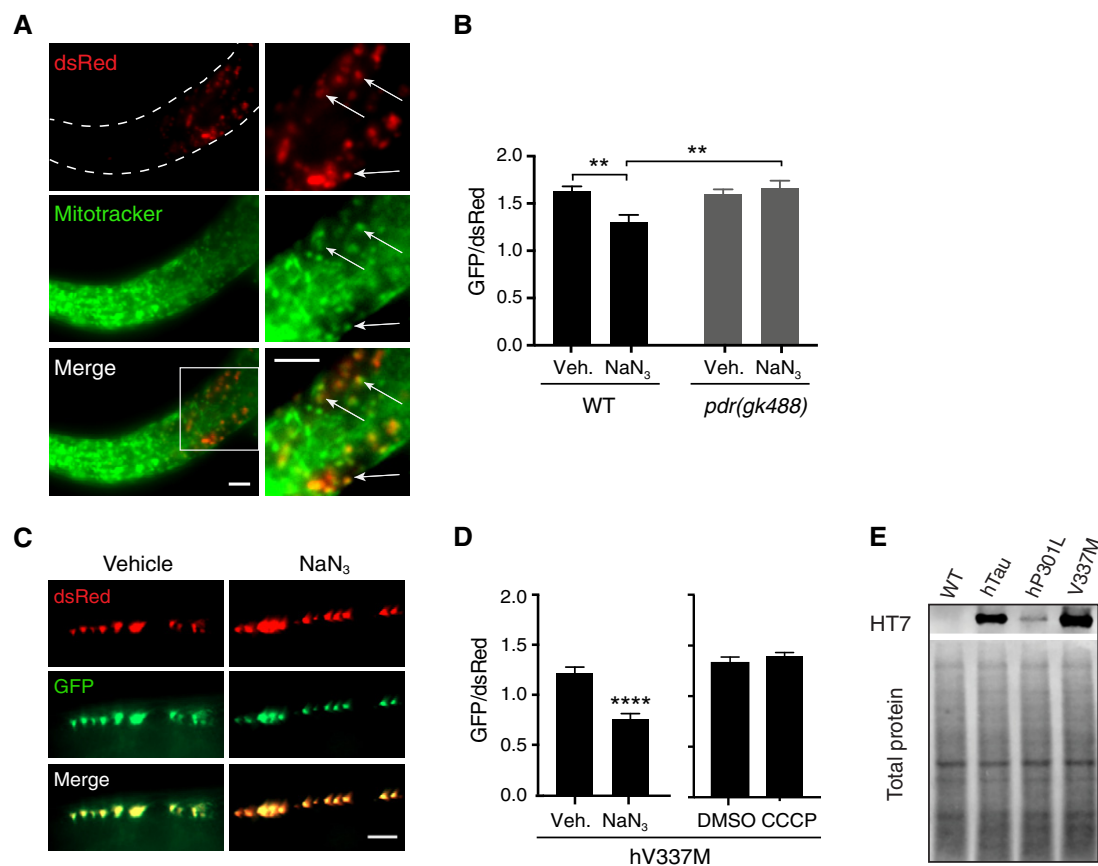

**Figure EV4. Characterisation of mito-Rosella *Caenorhabditis elegans* and the effect of hV337M-Tau on mitophagy in *C. elegans* neurons.**

- A Mitotracker Deep Red staining illustrating colocalisation between Mitotracker (pseudo-coloured green for better visualisation) and mito-Rosella (dsRed). Scale bars = 5  $\mu\text{m}$ .
- B Analysis of mitophagy in wild-type worms and *pdr-1(gk488)* mutant animals in response to  $\text{NaN}_3$ . Data were analysed using two-way ANOVA, revealing a main effect of genotype  $F(1, 106) = 6.415$ ,  $P = 0.0128$ ; a main effect of  $\text{NaN}_3$  treatment  $F(1, 106)$ ,  $P = 0.047$ ; and a significant interaction effect  $F(1, 106)$ ,  $P = 0.0041$ ;  $n = 26$ – $29$  animals/group.
- C, D Analysis of mitophagy in worms expressing hV337M-Tau in response to  $\text{NaN}_3$  (Mann–Whitney  $U$ -test,  $U = 25$ ,  $P < 0.0001$ ,  $n = 16$ ,  $19$  for vehicle and  $\text{NaN}_3$ , respectively), and CCCP treatment (unpaired  $t$ -test,  $t = 0.8113$ ,  $P = 0.4211$ ,  $n = 25$ ,  $27$  for DMSO and CCCP, respectively).
- E Tau expression in worm lysates detected with the human tau-specific antibody HT7 (extended immunoblot from Fig 6).

Data information: Data are given as mean and SEM.  $**P < 0.01$ ,  $****P < 0.0001$ . Scale bar = 10  $\mu\text{m}$ .  
Source data are available online for this figure.
